# Supplementary material for: Recording long-term potentiation of synaptic transmission by three-dimensional multi-electrode arrays
Source: PubMed Central journal article supplement (PMC1574331; doi:10.1186/1471-2202-7-61), 2006-08-30

**A**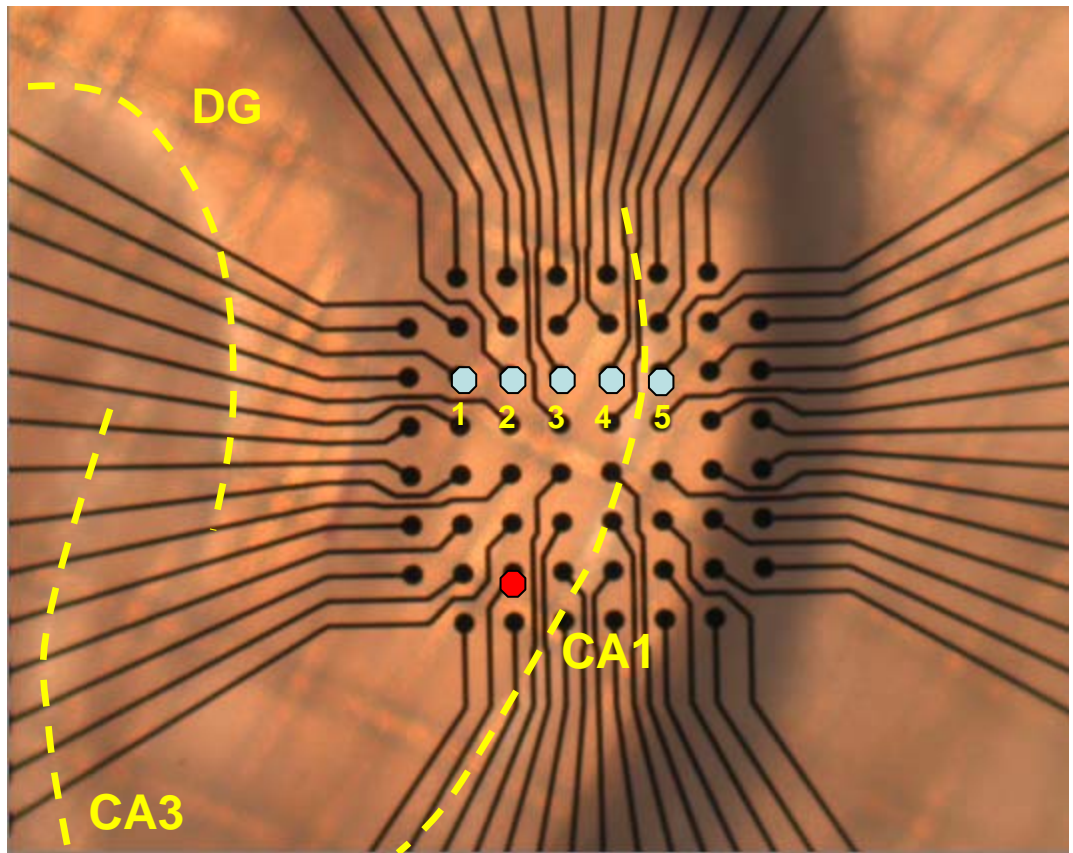**B**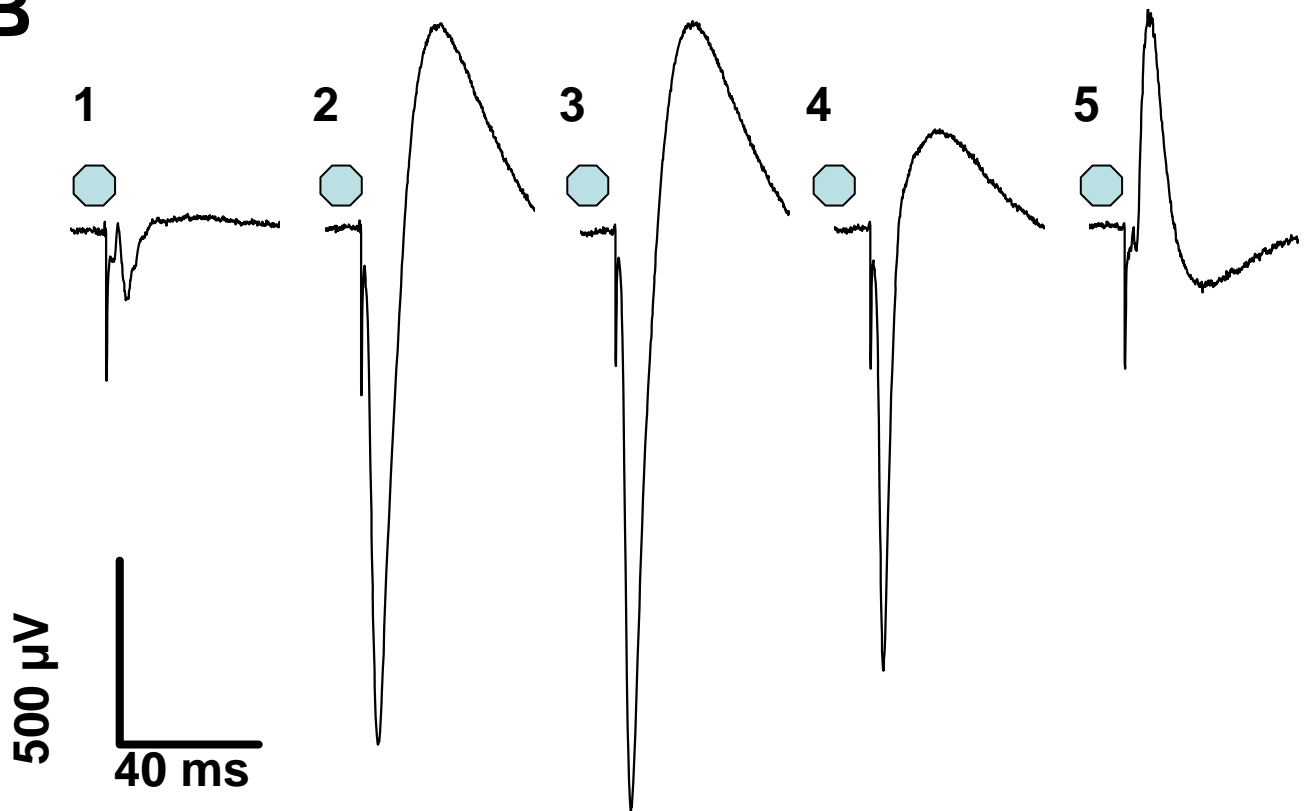

Supplement: 1471-2202-7-61-S1.pdf [file 1471-2202-7-61-S1.pdf]
